# Supplementary material
Source: MDPI journal article supplement (https://www.mdpi.com/2311-5521/9/4/81)
Supplement: s1 [file s1 › fluids-2877378-supplementary.pdf]

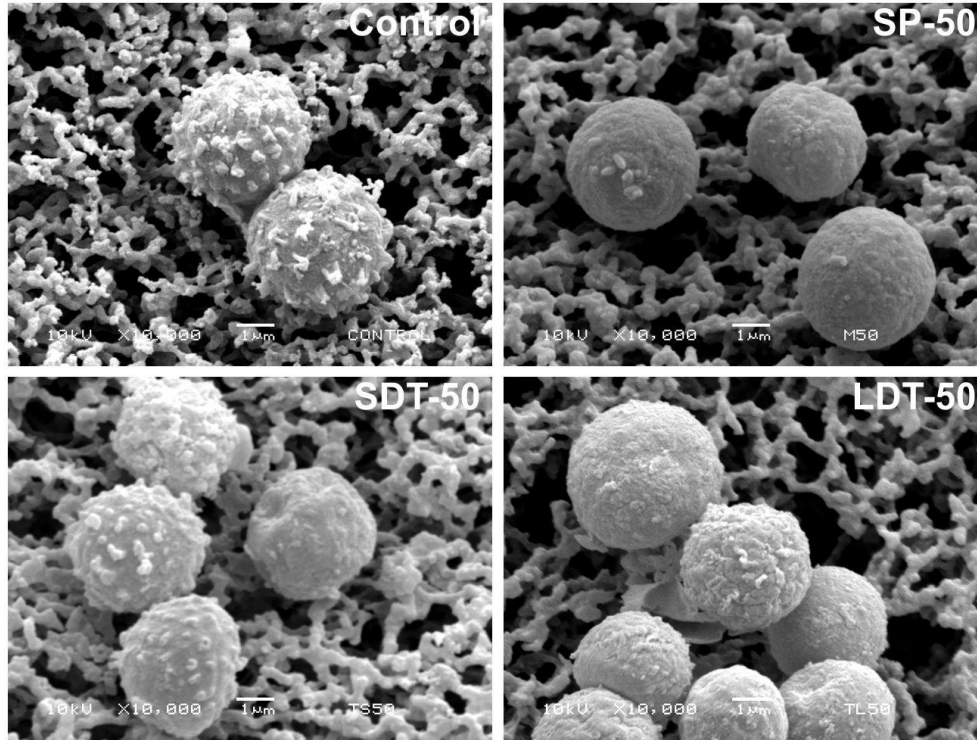

**Figure S1.** SEM images at a lower magnification ( $\times 10,000$ ) compared to Figure 3, providing a wider field of view. The shock wave treatment type (Control, SP, SDT, LDT) is indicated in the upper right corner of each image. Samples for SP, SDT, and LDT were subjected to 50 shock waves.
